# Supplementary material for: Flood exposure of environmental assets
Source: Copernicus journal article supplement (doi:10.5194/nhess-25-565-2025), 2025-02-10
Supplement: Supplementary file 1 [file nhess-25-565-2025-supplement.zip]

## Sheet: Assets collection
Main data source	https://www502.regione.toscana.it/geoscopio/cartoteca.html
Environmental assets of Tuscany
Agricultural areas with landscape and cultural significance
Areas inside historical landscapes
Areas of high public interest
Wildlife protection areas
Vehicle stages of naturalistic network
Cave entrances
Coastal territories
Gas emitting
Glacial circus
Groundwaters
Karst forms
Karst springs
Lakes with perimeter greater than 500m
Lake buffer areas
Monumental trees
Mountains higher than 1200m
MTB tracks
National parks
National reserves
Natura2000
Wildlife protection oasis
Provincial parks
Provincial reserves
RAMSAR
Regional parks
Rivers
Natural sinkholes
UNESCO
Viewpoints
Water springs
Woods and forests
Wildlife restocking areas
Environmental assets of Orcia and Chiana valleys
Agricultural areas with landscape and cultural significance
Areas inside historical landscapes
Areas of high public interest
Wildlife protection areas
Cave entrances
Groundwaters
Karst springs
Lakes with perimeter greater than 500m
Lake buffer areas
Monumental trees
Natura2000
Provincial reserves
Rivers
UNESCO
Water springs
Woods and forests
Wildlife restocking areas
Areas of archaeological interest
Assets	Description
Agricultural areas with landscape and cultural significance	Pursuant to the Article 64, paragraph 3, letter a) of the Code (PIT Tuscany region). They are rural areas with a high landscape value whose structure contributes to the enhancement of the historic centres and nuclei of which they form the context.
Areas inside historical landscapes	Pursuant to the Article 64, paragraph 3, letter c) of the Code (PIT Tuscany region). They are agricultural and pastoral landscapes of historical interest involved in forestation processes, natural or artificial, subject to recovery for agricultural purposes referred to in Article 2 of Legislative Decree 18 May 2001, no. 227 (Orientation and modernization of the forestry sector, pursuant to Articl…
Areas of archaeological interest	Pursuant to art. 142, paragraph 1 letter a) of the Code (PIT Tuscany region). They are the areas of archaeological interest characterized by coexisting and concurrent requirements deriving from the presence of archaeological assets - emerging or buried - and from the intrinsic link they present with the surrounding landscape, to give life to an inseparable complex characterized by a profound inte…
Areas of high public interest	They are buildings and areas of considerable public interest pursuant to Article 136 of the Code: [“Disciplina dei beni paesaggistici (artt. 134 e 157 del Codice)” PIT Tuscany region]; a) immovable things that have conspicuous characters of natural beauty, geological singularity or historical memory, monumental trees; b) villas, gardens and parks, not protected by the provisions of Part Two of th…
Wildlife protection areas	Protection Oasis of the Tuscany Region art. 15 LR 01/12/1994, n. 3 Transposition of Law 11/02/1992, n.157 'Rules for the protection of homeothermic wildlife and for hunting'. As defined in the wildlife and hunting plan (PFVR) of the Tuscany region. The environmental components potentially affected by the actions of the PFVR have been identified with reference to the aspects listed in Annex VI let…
Vehicle stages of naturalistic network; MTB tracks; Viewpoints; Tracks of naturalistic network	Network of thematic itineraries connecting the regional natural reserves aimed at enhancing and promoting the regional system of protected areas and biodiversity for tourism-environmental purposes. Each itinerary, divided into stages, is characterized by the presence of one or more reference themes (which represent the true originality of this project) and can be travelled on foot (trekking), by …
Cave entrances	As reported in the Regional Geological database, released by the Tuscany region.
Gas emitting	As reported in the Regional Geological database, released by the Tuscany region.
Karst forms	As reported in the Regional Geological database, released by the Tuscany region.
Karst springs	As reported in the Regional Geological database, released by the Tuscany region.
Natural sinkholes	As reported in the Regional Geological database, released by the Tuscany region.
Coastal territories	Pursuant to art. 142, paragraph 1 letter a) of the Code (PIT Tuscany region). They are the coastal territories included in the depth range of 300 meters, starting from the shoreline, also for the elevated land above the sea. Shore line, shore line or coastline, is defined as the line of intersection between the sea surface, adopting the average value of its level, coinciding with the orthometric …
Glacial circus	Pursuant to art. 142, paragraph 1 letter e) of the Code (PIT Tuscany region). They are the glacial cirques. Glacial cirques are defined as amphitheatre-shaped basins or niches produced by the plough action exerted by a glacier. The glacial cirques are characterized by the presence of: - a head or crown with sub-vertical walls outlined by thin sharp ridges; - a threshold modelled in rock which del…
Groundwaters	Following the DGRT n. 225/2003 of the Tuscany Region, 45 CISSs were formally established, called Subterranean Significant Water Bodies, to define the level of protection to be guaranteed and any remediation actions to be implemented through the Protection Plan. Of the 45 CISSs identified by the Tuscany Region, 29 consisted of aquifers in porous media and 16 in fractured media. Based on the resolu…	not
Lakes with perimeter greater than 500m	As reported in the dataset “Sistema acque_CTR 10K” of the Tuscany Region
Lake buffer areas	Pursuant to art. 142, paragraph 1 letter b) of the Code (PIT Tuscany region). They are the territories adjacent to the lakes included in a strip 300 m deep from the shoreline, also for the elevated territories on the lakes. Lakes are defined as permanent internal surface water bodies, natural, modified and/or artificial, including artificial reservoirs, transitional waters (lagoons, brackish lake…
Monumental trees	As defined in the new regional list (Annex B of the Regional Council resolution 8 of 2019) it includes a total of 78 plants and will be periodically updated pursuant to art. 99, paragraph 4, of the regional law 30/2015 based on the proposals for new insertions by the Municipalities. This list is an integral part of the "list of monumental trees in Italy" drawn up pursuant to Article 7 of Law 10/2…
Mountains higher than 1200m	Pursuant to art. 142, paragraph 1 letter d) of the Code (PIT Tuscany region). They are the mountains for the part exceeding 1,200 meters above sea level.
National parks, Regional parks, National reserves	Pursuant to art. 142, paragraph 1 letter f) of the Code (PIT Tuscany region). They are the national or regional parks and reserves, including the related external protection territories, as defined by art. 2 of the law n. 394/1991, and subsequent amendments and additions classified as: - national parks consisting of terrestrial, river, lake or marine areas that contain one or more ecosystems inta…
Natura2000	As defined by the European Commission, Natura 2000 is a network of sites selected to ensure the long-term survival of Europe's most valuable and threatened species and habitats. The Natura 2000 network stems from the Habitats Directive. Member States choose sites according to precise, scientific criteria, but the selection procedure varies depending on which of the two nature directives – Birds o…
Wildlife protection oasis	Protection Areas of the Tuscany Region art. 14 LR 12/01/1994, n. 3 Transposition of Law 11/02/1992, n.157 'Rules for the protection of homeothermic wildlife and for hunting'. As defined in the wildlife and hunting plan (PFVR) of the Tuscany region. The environmental components potentially affected by the actions of the PFVR have been identified with reference to the aspects listed in Annex VI let…
Provincial parks, Provincial reserves	As defined pursuant to the regional law n.30, 19 March 2015 “Norme per la conservazione e la valorizzazione del patrimonio naturalistico-ambientale regionale”
RAMSAR	They are wetlands of international importance, selected for designation by referring to the Criteria for identifying Wetlands of International Importance.
Rivers	All the hydrographic network of Tuscany region available as open data [DCR 81 2021], including the rivers pursuant to art. 142, paragraph 1 letter c) of the Code (PIT Tuscany region). They are rivers, streams, waterways registered in the lists provided for by the consolidated act of the provisions of the law on water and electrical systems, approved by Royal Decree 11 December 1933 n. 1775 (Annex…
UNESCO	As defined in the “Convention Concerning the Protection of the World Cultural and Natural Heritage” and summarized in the previous chapters of the present document. Refer to the full text here: https://whc.unesco.org/en/conventiontext
Water springs	As reported in the Regional Geological database, released by the Tuscany region. Also includes the data from BDSRI – Banca dati sottosuolo e risorse idriche – of the Tuscany region.
Woods and forests	As areas of protection identified pursuant to Legislative Decree 42/2004, art 142. The dataset is made up of Class 1 (Woods), Class 1bis (Roads in wooded areas) and Class 2 (Areas similar to woods) extracted from the 'Land use and cover' database of the Region Tuscany, photo interpreted by OFC of the year 2010 at a scale of 1: 10,000. The layer is a re-proposal of the one already present in the W…
Wildlife restocking areas	Restocking and Capture Areas of the Tuscany Region art. 16 LR 12/01/1994, n. 3 Transposition of Law 11/02/1992, n.157 'Rules for the protection of homeothermic wildlife and for hunting'. As defined in the wildlife and hunting plan (PFVR) of the Tuscany region. The environmental components potentially affected by the actions of the PFVR have been identified with reference to the aspects listed in …
