# Supplementary material for: Flood exposure of environmental assets
Source: Copernicus journal article supplement (doi:10.5194/nhess-25-565-2025), 2025-02-10
Supplement: Supplementary file 2 [file nhess-25-565-2025-supplement.zip]

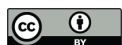

## *Supplement of*

## **Flood exposure of environmental assets**

**Gabriele Bertoli et al.**

*Correspondence to:* Chiara Arrighi ([chiara.arrighi@unifi.it](mailto:chiara.arrighi@unifi.it))

- [nhess-25-565-2025-supplement-title-page.pdf](#)
- Supplement
  - .DS\_Store
  - Assets collection
    - \* Assets collection details.xlsx
  - Survey
    - \* Environmental Heritage exposure to floods - Google Form.pdf

The copyright of individual parts of the supplement might differ from the article licence.
